# Supplementary material for: TURN Score Predicts 24-Hour Cerebral Edema After IV Thrombolysis
Source: Springer Nature journal article supplement (doi:10.1007/s12028-015-0198-6), 2015-09-04
Supplement: MOESM1 [file 9144760]

|  | Odds ratio | 95% confidence interval | P value |
| --- | --- | --- | --- |
| **ICH** |  |  |  |
| Baseline edema | 2.63 | 0.78, 8.95 | 0.12 |
| Baseline mass effect | 4.82 | 1.24, 18.70 | 0.02 |
| Baseline midline shift | - | - | - |
| 24 hour edema | 5.90 | 2.25, 15.46 | <0.001 |
| 24 hour mass effect | 8.39 | 3.21, 21.96 | <0.001 |
| 24 hour midline shift | 8.72 | 3.91, 19.46 | <0.001 |
| New edema | 3.88 | 1.74, 8.67 | 0.001 |
| New mass effect | 4.54 | 2.10, 9.82 | <0.001 |
| New midline shift | 8.72 | 3.91, 19.46 | <0.001 |
| **sICH** |  |  |  |
| Baseline edema | 4.18 | 1.06, 16.49 | 0.04 |
| Baseline mass effect | 12.00 | 2.96, 48.60 | <0.001 |
| Baseline midline shift | - | - | - |
| 24 hour edema | 6.67 | 1.53, 29.09 | 0.01 |
| 24 hour mass effect | 19.67 | 2.61, 148.27 | 0.004 |
| 24 hour midline shift | 20.62 | 7.78, 54.68 | <0.001 |
| New edema | 2.56 | 0.92,7.12 | 0.07 |
| New mass effect | 3.42 | 1.23, 9.54 | 0.02 |
| New midline shift | 20.62 | 7.78, 54.68 | <0.001 |
| **90 day mRS ≥ 5** |  |  |  |
| Baseline edema | 2.19 | 0.69, 6.94 | 0.18 |
| Baseline mass effect | 7.29 | 1.77, 29.98 | 0.006 |
| Baseline midline shift | - | - | - |
| 24 hour edema | 4.09 | 2.04, 8.20 | <0.001 |
| 24 hour mass effect | 7.88 | 3.73, 16.65 | <0.001 |
| 24 hour midline shift | 27.73 | 10.08, 76.32 | <0.001 |
| New edema | 2.85 | 1.54, 5.29 | 0.001 |
| New mass effect | 4.48 | 2.39, 8.41 | <0.001 |
| New midline shift | 27.73 | 10.08, 76.32 | <0.001 |
| **90 day mortality** |  |  |  |
| Baseline edema | 3.32 | 1.04, 10.61 | 0.04 |
| Baseline mass effect | 11.09 | 2.67, 46.00 | 0.001 |
| Baseline midline shift | - | - | - |
| 24 hour edema | 3.26 | 1.52, 7.00 | 0.002 |
| 24 hour mass effect | 6.50 | 2.82, 15.01 | <0.001 |
| 24 hour midline shift | 25.45 | 10.37, 62.44 | <0.001 |
| New edema | 2.03 | 1.04, 3.96 | 0.04 |
| New mass effect | 3.16 | 1.60, 6.24 | 0.001 |
| New midline shift | 25.45 | 10.37, 62.44 | <0.001 |

Supplemntal Table S1. Association between measures of brain swelling and outcome. Results from univariate logistic regression with outcome as the dependent variable. P values < 0.05 two-tailed considered statistically significant. ICH = intracerebral hemorrhage, sICH = symptomatic intracerebral hemorrhage, mRS = modified Rankin scale

| Score | Components |
| --- | --- |
| TURN | Prestroke mRS score, baseline NIHSS score |
| Stroke-TPI | Age, baseline NIHSS score, admission glucose |
| DRAGON | Age, prestroke mRS score, HDMCA or early CT infarct, glucose, OTT, baseline NIHSS score |
| SPAN-100 | Age, baseline NIHSS score |
| ASTRAL | Age, baseline NIHSS score, OTT, decreased level of consciousness, visual field defects, admission glucose |
| HAT | DM or glucose, baseline NIHSS score, early CT hypodensity |
| SEDAN | Age, baseline NIHSS score, admission glucose, HDMCA sign, early CT infarct |

Supplemental Table S2. Patient characteristics used to derive clinical scores [19](#_ENREF_19). NIHSS = National Institute of Health Stroke Scale score, mRS = modified Rankin Scale, HDMCA = Hyperdense Middle Cerebral Artery sign, OTT = Onset To Treatment interval, DM = Diabetes Mellitus, CT = Computed Tomography, BP = Blood Pressure, TURN = Thrombolysis risk Using mRS and NIHSS, Stroke-TPI = Stroke-Thrombolytic Predictive Instrument, SPAN-100 = Stroke Prognostication using Age and NIH Stroke Scale-100, ASTRAL = Acute Stroke Registry and Analysis of Lausanne, HAT = Hemorrhage After Thrombolysis.

|  | Odds ratio (95% CI) | Standard error | P |T| > |t| | AUROC (95% CI) | Standard error | P |T| > |t| |
| --- | --- | --- | --- | --- | --- | --- |
| TURN | 2.22 (0.93, 5.28) | 0.98 | 1.00 | 0.66 (0.42, 0.90) | 0.12 | 1.00 |
| Stroke-TPI | 1.97 (1.08, 3.60) | 0.61 | 0.83 | 0.67 (0.42, 0.93) | 0.13 | 0.95 |
| DRAGON | 1.86 (1.09, 3.19) | 0.51 | 0.75 | 0.70 (0.51, 0.89) | 0.10 | 0.79 |
| SPAN-100 | 1.06 (0.99, 1.12) | 0.03 | 0.24 | 0.67 (0.42, 0.93) | 0.13 | 0.95 |
| ASTRAL | 1.09 (1.01, 1.18) | 0.04 | 0.25 | 0.69 (0.46, 0.91) | 0.12 | 0.88 |
| HAT | 2.76 (1.47, 5.19) | 0.89 | 0.68 | 0.79 (0.62, 0.96) | 0.09 | 0.39 |
| SEDAN | 2.48 (1.24, 4.97) | 0.88 | 0.84 | 0.73 (0.54, 0.91) | 0.09 | 0.67 |

Supplemental Table S3. Prediction of baseline brain swelling after IV rt-PA therapy. Odds ratios from univariate logistic regression using baseline brain swelling as the dependent variable. P values from comparison to TURN using unequal variance two-sample t-tests with Welch’s approximation. P values < 0.05 two-tailed considered statistically significant. rt-PA = recombinant tissue plasminogen activator, AUROC = area under receiver operating characteristic curve, TURN = Thrombolysis risk Using mRS and NIHSS, Stroke-TPI = Stroke-Thrombolytic Predictive Instrument, SPAN-100 = Stroke Prognostication using Age and NIH Stroke Scale-100, ASTRAL = Acute Stroke Registry and Analysis of Lausanne, HAT = Hemorrhage After Thrombolysis.

|  | Odds ratio (95% CI) | Standard error | P |T| > |t| | AUROC (95% CI) | Standard error | P |T| > |t| |
| --- | --- | --- | --- | --- | --- | --- |
| TURN | 2.51 (1.80, 3.49) | 0.42 | 1.00 | 0.69 (0.63, 0.75) | 0.03 | 1.00 |
| Stroke-TPI | 1.72 (1.40, 2.12) | 0.18 | 0.09 | 0.69 (0.63, 0.75) | 0.03 | 0.88 |
| DRAGON | 1.40 (1.18, 1.66) | 0.12 | 0.01 | 0.63 (0.57, 0.69) | 0.03 | 0.15 |
| SPAN-100 | 1.03 (1.01, 1.04) | 0.01 | <0.001 | 0.61 (0.54, 0.67) | 0.03 | 0.05 |
| ASTRAL | 1.09 (1.06, 1.12) | 0.02 | <0.001 | 0.71 (0.65, 0.77) | 0.03 | 0.67 |
| HAT | 2.09 (1.60, 2.73) | 0.28 | 0.41 | 0.69 (0.63, 0.75) | 0.03 | 0.91 |
| SEDAN | 1.38 (1.10, 1.73) | 0.16 | 0.01 | 0.59 (0.53, 0.65) | 0.03 | 0.02 |

Supplemental Table S4. Prediction of 24 hour brain swelling after IV rt-PA therapy. Odds ratios from univariate logistic regression using 24 hour brain swelling as the dependent variable. P values from comparison to TURN using unequal variance two-sample t-tests with Welch’s approximation. P values < 0.05 two-tailed considered statistically significant. rt-PA = recombinant tissue plasminogen activator, AUROC = area under receiver operating characteristic curve, TURN = Thrombolysis risk Using mRS and NIHSS, Stroke-TPI = Stroke-Thrombolytic Predictive Instrument, SPAN-100 = Stroke Prognostication using Age and NIH Stroke Scale-100, ASTRAL = Acute Stroke Registry and Analysis of Lausanne, HAT = Hemorrhage After Thrombolysis.

|  | Odds ratio (95% CI) | Standard error | P |T| > |t| | AUROC (95% CI) | Standard error | P |T| > |t| |
| --- | --- | --- | --- | --- | --- | --- |
| TURN | 2.12 (1.55, 2.89) | 0.34 | 1.00 | 0.67 (0.61, 0.73) | 0.03 | 1.00 |
| Stroke-TPI | 1.55 (1.28, 1.88) | 0.15 | 0.13 | 0.67 (0.61, 0.73) | 0.03 | 0.93 |
| DRAGON | 1.32 (1.12, 1.55) | 0.11 | 0.02 | 0.61 (0.55, 0.68) | 0.03 | 0.18 |
| SPAN-100 | 1.02 (1.00, 1.04) | 0.01 | 0.001 | 0.59 (0.53, 0.65) | 0.03 | 0.07 |
| ASTRAL | 1.07 (1.04, 1.10) | 0.01 | 0.002 | 0.69 (0.63, 0.75) | 0.03 | 0.71 |
| HAT | 1.69 (1.33, 2.16) | 0.21 | 0.29 | 0.66 (0.60, 0.72) | 0.03 | 0.75 |
| SEDAN | 1.21 (0.97, 1.51) | 0.14 | 0.01 | 0.56 (0.50, 0.62) | 0.03 | 0.01 |

Supplemental Table S5. Prediction of new brain swelling after IV rt-PA therapy. Odds ratios from univariate logistic regression using new brain swelling as the dependent variable. P values from comparison to TURN using unequal variance two-sample t-tests with Welch’s approximation. P values < 0.05 two-tailed considered statistically significant. rt-PA = recombinant tissue plasminogen activator, AUROC = area under receiver operating characteristic curve, TURN = Thrombolysis risk Using mRS and NIHSS, Stroke-TPI = Stroke-Thrombolytic Predictive Instrument, SPAN-100 = Stroke Prognostication using Age and NIH Stroke Scale-100, ASTRAL = Acute Stroke Registry and Analysis of Lausanne, HAT = Hemorrhage After Thrombolysis.

|  | Odds ratio (95% CI) | Standard error | P |T| > |t| | AUROC (95% CI) | Standard error | P |T| > |t| |
| --- | --- | --- | --- | --- | --- | --- |
| TURN | 5.32 (3.23, 8.74) | 1.35 | 1.00 | 0.82 (0.76, 0.88) | 0.03 | 1.00 |
| Stroke-TPI | 3.31 (2.36, 4.65) | 0.57 | 0.17 | 0.84 (0.78, 0.90) | 0.03 | 0.62 |
| DRAGON | 2.09 (1.61, 2.71) | 0.28 | 0.02 | 0.76 (0.70, 0.83) | 0.03 | 0.22 |
| SPAN-100 | 1.09 (1.06, 1.13) | 0.02 | 0.002 | 0.78 (0.71, 0.85) | 0.04 | 0.44 |
| ASTRAL | 1.17 (1.12, 1.23) | 0.03 | 0.002 | 0.84 (0.78, 0.90) | 0.03 | 0.60 |
| HAT | 2.86 (2.05, 3.99) | 0.49 | 0.09 | 0.78 (0.71, 0.85) | 0.04 | 0.41 |
| SEDAN | 2.10 (1.54, 2.87) | 0.33 | 0.02 | 0.70 (0.63, 0.77) | 0.04 | 0.02 |

Supplemental Table S6. Prediction of 90 day mortality after IV rt-PA therapy. Odds ratios from univariate logistic regression using 90 day mortality as the dependent variable. P values from comparison to TURN using unequal variance two-sample t-tests with Welch’s approximation. P values < 0.05 two-tailed considered statistically significant. rt-PA = recombinant tissue plasminogen activator, AUROC = area under receiver operating characteristic curve, TURN = Thrombolysis risk Using mRS and NIHSS, Stroke-TPI = Stroke-Thrombolytic Predictive Instrument, SPAN-100 = Stroke Prognostication using Age and NIH Stroke Scale-100, ASTRAL = Acute Stroke Registry and Analysis of Lausanne, HAT = Hemorrhage After Thrombolysis.
